# Supplementary material for: A Genomic Survey of Reb Homologs Suggests Widespread Occurrence of R-Bodies in Proteobacteria
Source: PubMed Central journal article supplement (PMC3583457; doi:10.1534/g3.112.005231), 2013-03-01
Supplement: supp_3.3.505_FigureS1.pdf [file supp_3.3.505_FigureS1.pdf]

## A genomic survey of Reb homologues suggests widespread occurrence of R-bodies in Proteobacteria

Kasie Raymann<sup>\*,§</sup>, Louis-Marie Bobay<sup>§,\*\*,§§</sup>, Thomas G. Doak<sup>\*\*\*</sup>, Michael Lynch<sup>\*\*\*</sup>, Simonetta Gribaldo<sup>\*,1</sup>

<sup>\*</sup> Institut Pasteur, Unité Biologie Moleculaire du Gene chez les Extremophiles, Departement de Microbiologie, Paris, 75724 Cedex 15 France

<sup>§</sup> Univ. Pierre et Marie Curie, Cellule Pasteur UPMC, Paris, 75724 Cedex 15 France

<sup>\*\*</sup> Institut Pasteur, Microbial Evolutionary Genomics, Departement Genomes et Genetique, Paris, 75724 Cedex 15 France

<sup>§§</sup> CNRS, UMR3525, Paris, F-75015 France

<sup>\*\*\*</sup> Indiana University, Department of Biology, 1001 East Third St., Bloomington, Indiana 47405

Corresponding author:

Simonetta Gribaldo

Unité Biologie Moleculaire du Gene chez les Extremophiles, Departement de Microbiologie

Institut Pasteur

25-28 rue du Dr Roux 75724

Paris Cedex 15, France

E-mail: [simonetta.gribaldo@pasteur.fr](mailto:simonetta.gribaldo@pasteur.fr)

Office Phone: +33144389455

Fax: +33145688834

**DOI: 10.1534/g3.112.005231**

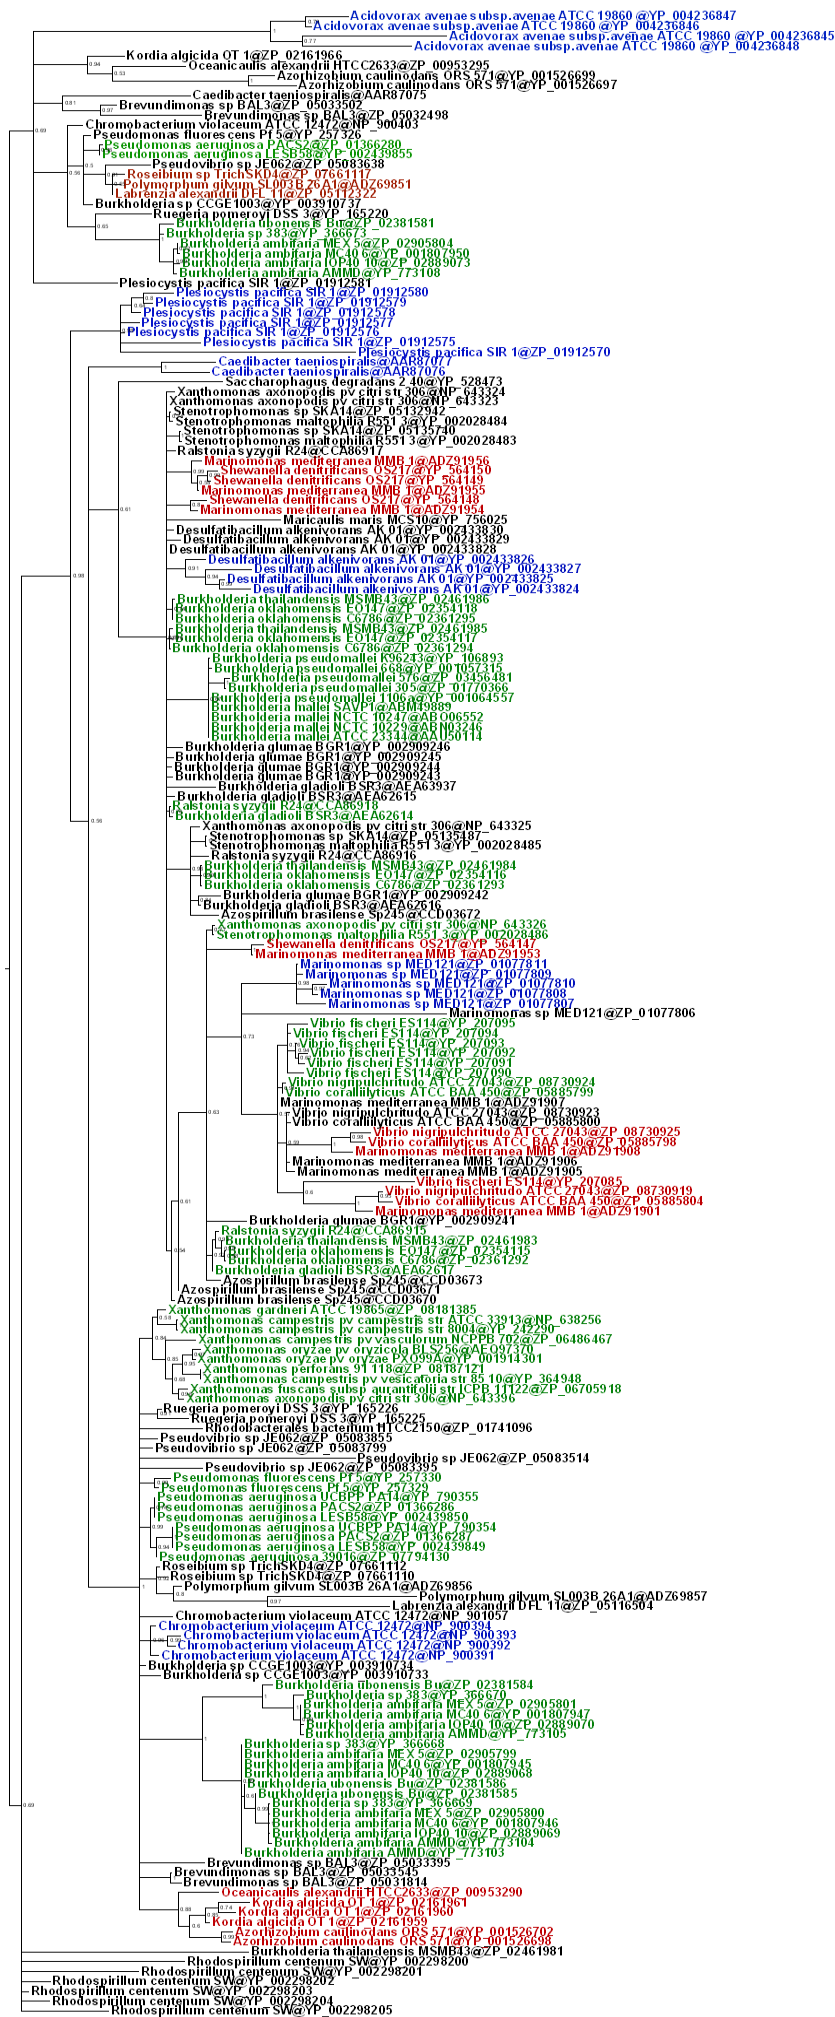

**Figure S1** Phylogeny of Reb homologues. Unrooted Bayesian phylogenetic tree of 203 Reb homologues. The tree was obtained by using Phylobayes 3.3 with the LG model of amino acid substitution and a discrete gamma distribution with four categories to take into account among-site rate variation. Note that the tree is not fully resolved due to the small number of positions that could be used for analysis (73 amino acids). Numbers at nodes represent posterior probabilities. The scale bar represents the average number of substitutions per site. Colored taxa correspond to the rebs represented in Figure 5.
